# Supplementary material for: Heterometallic ZnII–LnIII–ZnII Schiff Base Complexes with Linear or Bent Conformation—Synthesis, Crystal Structures, Luminescent and Magnetic Characterization
Source: MDPI journal article supplement (doi:10.3390/molecules23071761), 2018-07-18
Supplement: s1 [file s1]

# Heterometallic $\text{Zn}^{\text{II}}\text{--Ln}^{\text{III}}\text{--Zn}^{\text{II}}$ Schiff base complexes with linear or bent conformation – synthesis, crystal structures, luminescent and magnetic characterization

Barbara Mirosław <sup>1,\*</sup>, Beata Cristóvão <sup>2</sup> and Zbigniew Hnatejko <sup>3</sup>

<sup>1</sup> Department of Crystallography, Faculty of Chemistry, Maria Curie-Skłodowska University, Maria Curie-Skłodowska sq. 3, 20-031 Lublin, Poland

<sup>2</sup> Department of General and Coordination Chemistry, Faculty of Chemistry, Maria Curie-Skłodowska University, Maria Curie-Skłodowska sq. 2, 20-031 Lublin, Poland; beata.cristovao@poczta.umcs.lublin.pl

<sup>3</sup> Department of Rare Earths, Faculty of Chemistry, Adam Mickiewicz University, Umultowska 89b, 61-614 Poznań, Poland; zbychuh@amu.edu.pl

\* Correspondence: barbara.miroslaw@umcs.lublin.pl; Tel.: +48-81-537-55-82

## List of items:

- **Table S1.** Selected coordination compounds with Schiff base ligand having 2-hydroxypropyl bridge. Involvement of the 2-hydroxypropyl bridge in the formation of coordination bond.
- **Table S2.** Crystallographic data for complexes **1–5**.
- **Figure S1.** Location of hydrogen bonded  $\text{NO}_3^-$  anion and water molecule in pockets formed by 2-hydroxypropyl groups in complex  $\text{Zn}^{\text{II}}\text{--Nd}^{\text{III}}\text{--Zn}^{\text{II}}$  (**1**).
- **Figure S2.** Location of hydrogen bonded  $\text{NO}_3^-$  anion and methanol molecule in pockets formed by 2-hydroxypropyl groups in complex  $\text{Zn}^{\text{II}}\text{--Sm}^{\text{III}}\text{--Zn}^{\text{II}}$  (**2**).
- **Figure S3.** Location of disordered hydrogen bonded  $\text{NO}_3^-$  anion and water molecule in pockets formed by 2-hydroxypropyl groups in complex  $\text{Zn}^{\text{II}}\text{--Eu}^{\text{III}}\text{--Zn}^{\text{II}}$  (**3**).
- **Figure S4.** The absorbance spectra of compounds  $\text{Zn}^{\text{II}}\text{--Eu}^{\text{III}}\text{--Zn}^{\text{II}}$  (**3**),  $\text{Zn}^{\text{II}}\text{--Tb}^{\text{III}}\text{--Zn}^{\text{II}}$  (**4**) and  $\text{Zn}^{\text{II}}\text{--Dy}^{\text{III}}\text{--Zn}^{\text{II}}$  (**5**) in methanol solution ( $\sim 2 \cdot 10^{-5}$  M).
- **Figure S5.** Luminescence spectrum of complex **1** ( $\text{Zn}^{\text{II}}\text{--Nd}^{\text{III}}\text{--Zn}^{\text{II}}$ ) in methanol solution ( $\sim 2 \cdot 10^{-5}$  M).
- **Figure S6.** Solid state emission spectra of complexes **3** ( $\text{Zn}^{\text{II}}\text{--Eu}^{\text{III}}\text{--Zn}^{\text{II}}$ ) and **4** ( $\text{Zn}^{\text{II}}\text{--Tb}^{\text{III}}\text{--Zn}^{\text{II}}$ ).
- **Figure S7.** Temperature dependence of the experimental  $\chi_M^{-1}$  versus  $T$  for  $\text{Zn}^{\text{II}}\text{--Nd}^{\text{III}}\text{--Zn}^{\text{II}}$  (**1**).
- **Figure S8.** Temperature dependence of the experimental  $\chi_M^{-1}$  versus  $T$  for  $\text{Zn}^{\text{II}}\text{--Tb}^{\text{III}}\text{--Zn}^{\text{II}}$  (**4**) and  $\text{Zn}^{\text{II}}\text{--Dy}^{\text{III}}\text{--Zn}^{\text{II}}$  (**5**).
- **Table S3.** Theoretical and experimental values of the  $\chi_M T$  product for compounds **1**, **4**, **5** at the room temperature.
- **Figure S9.**  $^1\text{H}$  NMR spectrum of ligand **H<sub>3</sub>L** in  $\text{CDCl}_3$  solution.
- **Figure S10.**  $^{13}\text{C}$  NMR spectrum of ligand **H<sub>3</sub>L** in  $\text{DMSO-d}_6$  solution.

**Table S1.** Selected coordination compounds with Schiff base ligand having 2-hydroxypropyl bridge.  
<sup>1</sup>Involvement of the 2-hydroxypropyl bridge in the formation of coordination bond.

| Structure                                                                           | Refcode | Nuclearity | Metals | OH group <sup>1</sup> | Ref. |
|-------------------------------------------------------------------------------------|---------|------------|--------|-----------------------|------|
| 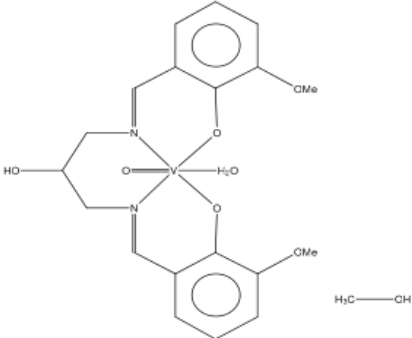   | ABOZUP  | 1          | V      | No                    | [1]  |
|   | BEGHEB  | 1          | V      | No                    | [2]  |
|  | FEKHEJ  | 1          | V      | Yes                   | [3]  |
|  | FEKHIN  | 1          | V      | Yes                   | [3]  |
|  | TIYYUX  | 2          | CuNa   | No                    | [4]  |

| Structure                                                                           | Refcode  | Nuclearity | Metals | OH group <sup>1</sup> | Ref. |
|-------------------------------------------------------------------------------------|----------|------------|--------|-----------------------|------|
| 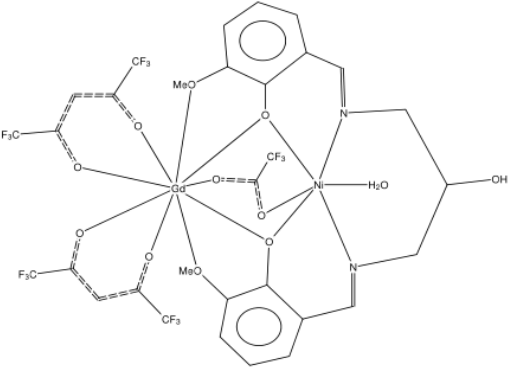   | JAZFOI01 | 2          | NiGd   | No                    | [5]  |
|   | JAZFUO01 | 2          | NiTb   | No                    | [5]  |
|  | JAZGAV01 | 2          | NiEu   | No                    | [5]  |
|  | YECKOJ   | 2          | NiTb   | No                    | [5]  |

| Structure                                                                           | Refcode | Nuclearity | Metals | OH group <sup>1</sup> | Ref. |
|-------------------------------------------------------------------------------------|---------|------------|--------|-----------------------|------|
| 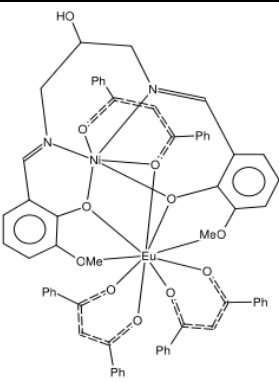   | YECKUP  | 2          | NiEu   | No                    | [5]  |
|   | YECLAW  | 2          | NiGd   | No                    | [5]  |
|  | YECLEA  | 2          | NiHo   | No                    | [5]  |

| Structure                                                                           | Refcode | Nuclearity | Metals | OH group <sup>1</sup> | Ref. |
|-------------------------------------------------------------------------------------|---------|------------|--------|-----------------------|------|
| 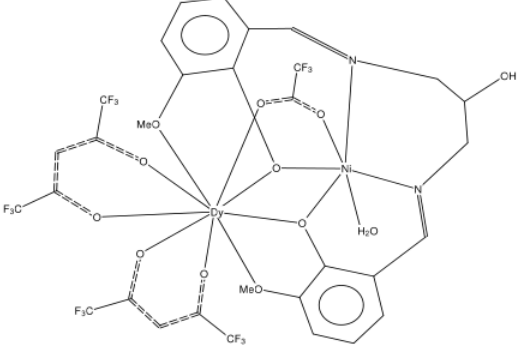   | YECLIE  | 2          | NiDy   | No                    | [5]  |
|    | CANDUT  | 2          | ZnTb   | No                    | [6]  |
|   | YUFKUH  | 2          | CoDy   | Yes                   | [7]  |
|  | YUFWIH  | 2          | CuDy   | No                    | [7]  |

| Structure                                                                           | Refcode | Nuclearity | Metals | OH group <sup>1</sup> | Ref. |
|-------------------------------------------------------------------------------------|---------|------------|--------|-----------------------|------|
| 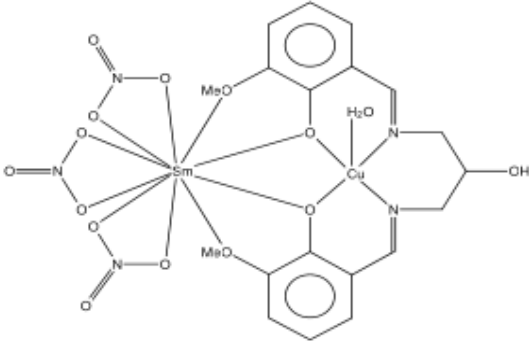   | KEZYIZ  | 2          | CuSm   | No                    | [8]  |
|   | KEZYOF  | 2          | CuHg   | No                    | [8]  |
|  | KEZYUL  | 2          | CuPb   | No                    | [8]  |
|  | KEZZAS  | 2          | CuCd   | No                    | [8]  |

| Structure                                                                           | Refcode | Nuclearity | Metals | OH group <sup>1</sup> | Ref. |
|-------------------------------------------------------------------------------------|---------|------------|--------|-----------------------|------|
| 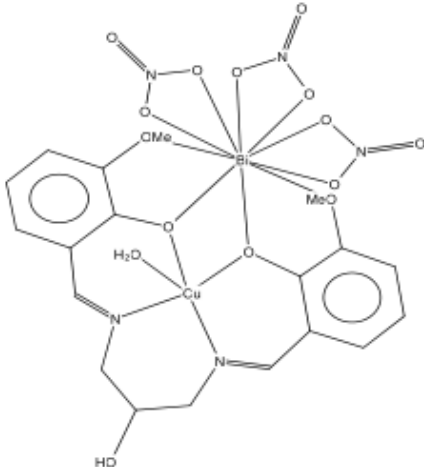   | KEZZEW  | 2          | CuBi   | No                    | [8]  |
|   | LUXBOX  | 2          | CuGd   | No                    | [9]  |
|  | LUXBUD  | 2          | CuTb   | No                    | [9]  |
|  | LUXCAK  | 2          | CuDy   | No                    | [9]  |

| Structure                                                                           | Refcode | Nuclearity | Metals          | OH group <sup>1</sup> | Ref. |
|-------------------------------------------------------------------------------------|---------|------------|-----------------|-----------------------|------|
| 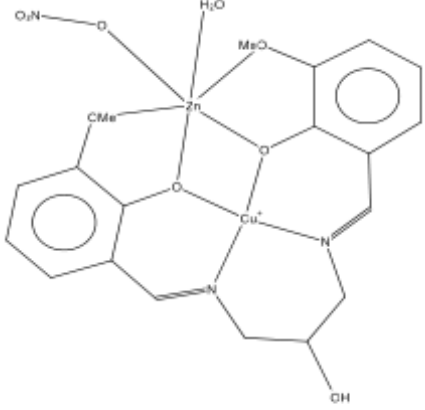   | VEYLES  | 2          | CuZn            | No                    | [8]  |
|   | IWIHEB  | 2          | Cu <sub>2</sub> | Yes                   | [10] |
|  | BOQLOJ  | 2          | Fe <sub>2</sub> | Yes                   | [11] |
|  | RINXUJ  | 2          | Fe <sub>2</sub> | Yes                   | [12] |



| Structure                                                                           | Refcode | Nuclearity | Metals            | OH group <sup>1</sup> | Ref. |
|-------------------------------------------------------------------------------------|---------|------------|-------------------|-----------------------|------|
|    | VEYLAO  | 2          | CuNa              | No                    | [8]  |
|   | ENICAH  | 3          | Cd <sub>3</sub>   | No                    | [13] |
|  | ENICEL  | 3          | Cd <sub>3</sub>   | No                    | [13] |
|  | ENICIP  | 3          | Cd <sub>3</sub>   | No                    | [13] |
|  | KEPQIG  | 3          | V <sub>2</sub> Ce | Yes                   | [14] |

| Structure                                                                           | Refcode  | Nuclearity | Metals                          | OH group <sup>1</sup> | Ref. |
|-------------------------------------------------------------------------------------|----------|------------|---------------------------------|-----------------------|------|
| 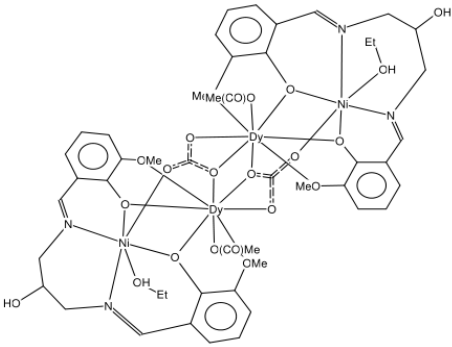   | JASTUV01 | 4          | Ni <sub>2</sub> Dy <sub>2</sub> | No                    | [5]  |
|    | YECJUO   | 4          | Ni <sub>2</sub> Ho <sub>2</sub> | No                    | [5]  |
|   | YECKAV   | 4          | Ni <sub>2</sub> Er <sub>2</sub> | No                    | [5]  |
|  | YECKEZ   | 4          | Ni <sub>2</sub> Tm <sub>2</sub> | No                    | [5]  |

| Structure                                                                           | Refcode | Nuclearity | Metals                          | OH group <sup>1</sup> | Ref. |
|-------------------------------------------------------------------------------------|---------|------------|---------------------------------|-----------------------|------|
| 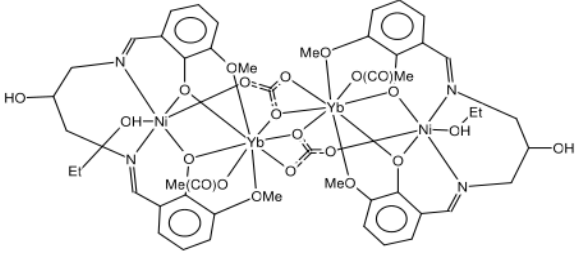   | YECKID  | 4          | Ni <sub>2</sub> Yb <sub>2</sub> | No                    | [5]  |
|    | YECLOK  | 4          | Ni <sub>2</sub> Tb <sub>2</sub> | No                    | [5]  |
|   | ENEZEE  | 4          | Co <sub>4</sub>                 | Yes                   | [13] |
|  | ENEZOO  | 4          | Co <sub>4</sub>                 | Yes                   | [13] |
|  | ENEZUU  | 4          | Zn <sub>4</sub>                 | Yes                   | [13] |

| Structure                                                                           | Refcode | Nuclearity | Metals                          | OH group <sup>1</sup> | Ref. |
|-------------------------------------------------------------------------------------|---------|------------|---------------------------------|-----------------------|------|
| 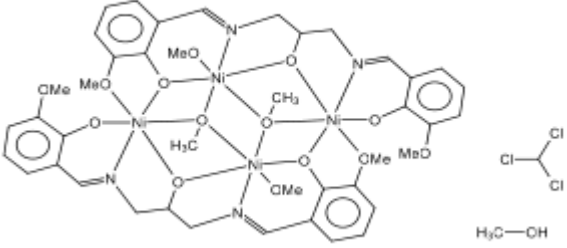   | ENEZII  | 4          | Ni <sub>4</sub>                 | Yes                   | [13] |
|    | ENICOV  | 4          | Ni <sub>4</sub>                 | Yes                   | [13] |
|   | ENICUB  | 4          | Ni <sub>4</sub>                 | Yes                   | [13] |
|  | XASDAZ  | 4          | Zn <sub>2</sub> Dy <sub>2</sub> | No                    | [15] |
|  | XASDED  | 4          | Zn <sub>2</sub> Tb <sub>2</sub> | No                    | [15] |
|  | XASDIH  | 4          | Zn <sub>2</sub> Eu <sub>2</sub> | No                    | [15] |

| Structure                                                                                                                                             | Refcode | Nuclearity | Metals          | OH group <sup>1</sup> | Ref. |
|-------------------------------------------------------------------------------------------------------------------------------------------------------|---------|------------|-----------------|-----------------------|------|
| 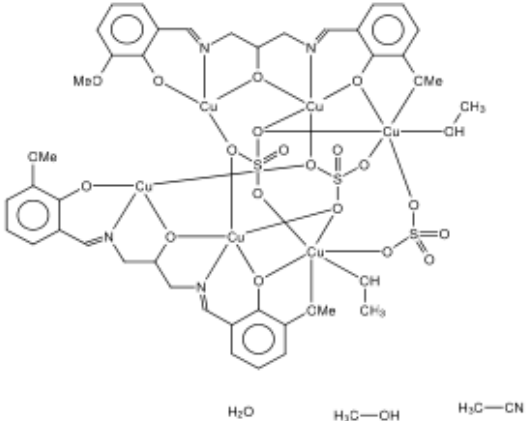 <p>H<sub>2</sub>O      H<sub>3</sub>C—OH      H<sub>3</sub>C—CN</p> | BOQMEA  | 6          | Cu <sub>6</sub> | Yes                   | [11] |
|  <p>Cl<sup>-</sup>      H<sub>3</sub>C—OH</p>                       | DAVZOR  | 6          | Nd <sub>6</sub> | Yes                   | [16] |
|  <p>Cl<sup>-</sup>      H<sub>3</sub>C—OH</p>                      | DAVZUX  | 6          | Tb <sub>6</sub> | Yes                   | [16] |

| Structure                                                                           | Refcode | Nuclearity | Metals                          | OH group <sup>1</sup> | Ref. |
|-------------------------------------------------------------------------------------|---------|------------|---------------------------------|-----------------------|------|
| 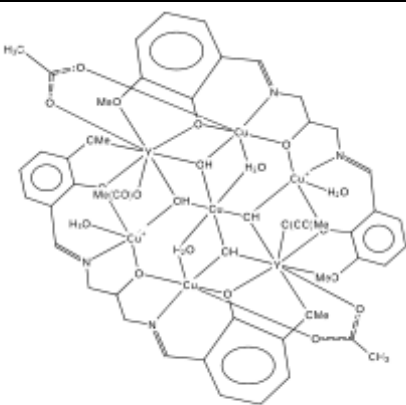   | CONZAI  | 7          | Cu <sub>5</sub> V <sub>2</sub>  | Yes                   | [17] |
|   | CONZEM  | 7          | Cu <sub>5</sub> Lu <sub>2</sub> | Yes                   | [17] |
|  | CONZIQ  | 7          | Cu <sub>5</sub> Dy <sub>2</sub> | Yes                   | [17] |

| Structure                                                                           | Refcode | Nuclearity | Metals                          | OH group <sup>1</sup> | Ref. |
|-------------------------------------------------------------------------------------|---------|------------|---------------------------------|-----------------------|------|
| 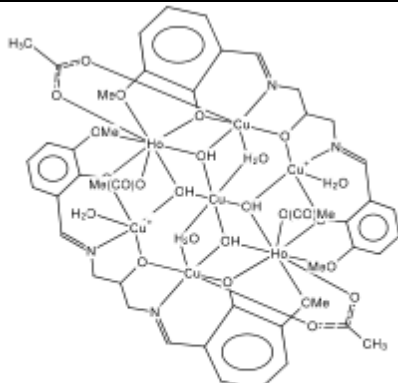   | CONZOW  | 7          | Cu <sub>5</sub> Ho <sub>2</sub> | Yes                   | [17] |
|   | CONZUC  | 7          | Cu <sub>5</sub> Er <sub>2</sub> | Yes                   | [17] |
|  | COPBAM  | 7          | Cu <sub>5</sub> Yb <sub>2</sub> | Yes                   | [17] |

| Structure                                                                          | Refcode | Nuclearity | Metals              | OH group <sup>1</sup> | Ref. |
|------------------------------------------------------------------------------------|---------|------------|---------------------|-----------------------|------|
| 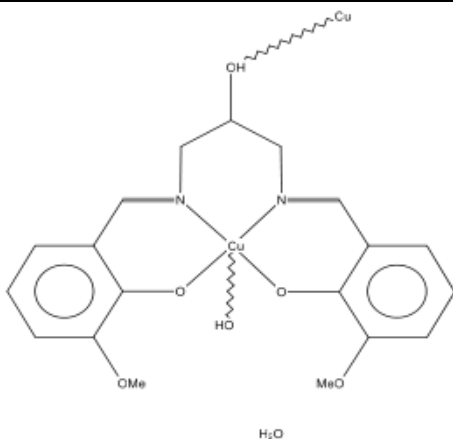  | REFJIX  | Polymer    | {Cu} <sub>n</sub>   | Yes                   | [18] |
|  | CIKPAP  | polymer    | {CuNa} <sub>n</sub> | Yes                   | [19] |

## References:

- Mahboubi-Anarjan, P.; Bikas, R.; Hosseini-Monfared, H.; Aleshkevych, P.; Mayer, P. Synthesis, Characterization, EPR Spectroscopy and Catalytic Activity of a New oxido vanadium(IV) Complex with N2O2-Donor Ligand. *J. Mol. Struct.* **2017**, *1131*, 258–265; DOI:10.1016/J.MOLSTRUC.2016.11.059.
- Smith, K. I.; Borer, L. L.; Olmstead, M. M. Vanadium(IV) and Vanadium(V) Complexes of Salicylaldimine Ligands. *Inorg. Chem.* **2003**, *42* (23), 7410–7415; DOI:10.1021/ic034640p.
- Tsuchimoto, M.; Ishii, T.; Imaoka, T.; Yamamoto, K. Synthesis and Electrochemical Properties of Oxovanadium Complexes with a Pentadentate Schiff Base Ligand. *Bull. Chem. Soc. Jpn.* **2004**, *77* (10), 1849–1854; DOI:10.1246/bcsj.77.1849.
- Datta, A.; Das, K.; Massera, C.; Clegg, J. K.; Sinha, C.; Huang, J.-H.; Garribba, E. A Mixed Valent Heterometallic Cu<sup>II</sup>/Na<sup>I</sup> Coordination Polymer with Sodium–phenyl Bonds. *Dalt. Trans.* **2014**, *43* (14), 5558–5563; DOI:10.1039/C4DT00189C.
- Jiang, L.; Liu, Y.; Liu, X.; Tian, J.; Yan, S. Three Series of Heterometallic Ni<sup>II</sup>–Ln<sup>III</sup> Schiff Base Complexes: Synthesis, Crystal Structures and Magnetic Characterization. *Dalt. Trans.* **2017**, *46* (37), 12558–12573; DOI:10.1039/C7DT02351K.
- Jiang, L. *CSD Communication, Private Communication*; 2017.
- Dolai, M.; Ali, M.; Titiš, J.; Boča, R. Cu(II)–Dy(III) and Co(III)–Dy(III) Based Single Molecule Magnets with Multiple Slow Magnetic Relaxation Processes in the Cu(II)–Dy(III) Complex. *Dalt. Trans.* **2015**, *44* (29), 13242–13249; DOI:10.1039/C5DT00960J.
- Dolai, M.; Mistri, T.; Panja, A.; Ali, M. Diversity in Supramolecular Self-Assembly through Hydrogen-Bonding Interactions of Non-Coordinated Aliphatic –OH Group in a Series of Heterodinuclear CuIIIM



- (M = NaI, ZnII, HgII, SmIII, BiIII, PbII and CdII). *Inorganica Chim. Acta* **2013**, 399, 95–104; DOI:10.1016/J.ICA.2013.01.006.
9. Chiboub Fellah, F. Z.; Boulefred, S.; Chiboub Fellah, A.; El Rez, B.; Duhayon, C.; Sutter, J.-P. Binuclear CuLn Complexes (LnIII = Gd, Tb, Dy) of Alcohol-Functionalized Bicompartamental Schiff-Base Ligand. Hydrogen Bonding and Magnetic Behaviors. *Inorganica Chim. Acta* **2016**, 439, 24–29; DOI:10.1016/J.ICA.2015.09.032.
  10. Elmali, A.; Zeyrek, C. T.; Elerman, Y. Crystal Structure, Magnetic Properties and Molecular Orbital Calculations of a Binuclear copper(II) Complex Bridged by an Alkoxo-Oxygen Atom and an Acetate Ion. *J. Mol. Struct.* **2004**, 693 (1–3), 225–234; DOI:10.1016/J.MOLSTRUC.2004.02.037.
  11. Lan, Y.; Novitchi, G.; Clérac, R.; Tang, J.-K.; Madhu, N. T.; Hewitt, I. J.; Anson, C. E.; Brooker, S.; Powell, A. K. Di-, Tetra- and Hexanuclear iron(III), manganese(II/III) and copper(II) Complexes of Schiff-Base Ligands Derived from 6-Substituted-2-Formylphenols. *Dalt. Trans.* **2009**, 10, 1721; DOI:10.1039/b818113f.
  12. Mitra, M.; Maji, A. K.; Ghosh, B. K.; Raghavaiah, P.; Ribas, J.; Ghosh, R. Catecholase Activity of a Structurally Characterized Dinuclear iron(III) Complex [FeIII<sub>2</sub>(L)<sub>2</sub>] [H<sub>3</sub>L = N,N'-bis(3-Methoxysalicylaldimine)-1,3-Diaminopropan-2-ol]. *Polyhedron* **2014**, 67, 19–26; DOI:10.1016/J.POLY.2013.08.064.
  13. Jiang, L.; Zhang, D.-Y.; Suo, J.-J.; Gu, W.; Tian, J.-L.; Liu, X.; Yan, S.-P. Synthesis, Magnetism and Spectral Studies of Six Defective Dicubane Tetranuclear {M<sub>4</sub>O<sub>6</sub>} (M = Ni<sup>II</sup>, Co<sup>II</sup>, Zn<sup>II</sup>) and Three Trinuclear Cd<sup>II</sup> Complexes with Polydentate Schiff Base Ligands. *Dalt. Trans.* **2016**, 45 (25), 10233–10248; DOI:10.1039/C6DT00380J.
  14. Tsuchimoto, M.; Ishii, T.; Imaoka, T.; Yamamoto, K.; Yoshioka, N.; Sunatsuki, Y. Synthesis and Structures of Vanadium–Cerium Trinuclear Complexes with Schiff-Base Ligands. *Bull. Chem. Soc. Jpn.* **2006**, 79 (9), 1393–1397; DOI:10.1246/bcsj.79.1393.
  15. Griffiths, K.; Mayans, J.; Shipman, M. A.; Tizzard, G. J.; Coles, S. J.; Blight, B. A.; Escuer, A.; Kostakis, G. E. Four New Families of Polynuclear Zn-Ln Coordination Clusters. Synthetic, Topological, Magnetic, and Luminescent Aspects. *Cryst. Growth Des.* **2017**, 17 (4), 1524–1538; DOI:10.1021/acs.cgd.6b01401.
  16. Liao, S.; Yang, X.; Jones, R. A. Self-Assembly of Luminescent Hexanuclear Lanthanide Salen Complexes. *Cryst. Growth Des.* **2012**, 12 (2), 970–974; DOI:10.1021/cg201444p.
  17. Chandrasekhar, V.; Dey, A.; Das, S.; Rouzières, M.; Clérac, R. Syntheses, Structures, and Magnetic Properties of a Family of Heterometallic Heptanuclear [Cu<sub>5</sub>Ln<sub>2</sub>] (Ln = Y(III), Lu(III), Dy(III), Ho(III), Er(III), and Yb(III)) Complexes: Observation of SMM Behavior for the Dy(III) and Ho(III) Analogues. *Inorg. Chem.* **2013**, 52 (5), 2588–2598; DOI:10.1021/ic302614k.
  18. Datta, A.; Clegg, J. K.; Huang, J.-H.; Pevec, A.; Garribba, E.; Fondo, M. Hydroxo-Bridged 1-D Coordination Polymer of Cu(II) Incorporating with Salicylaldimine Precursor: Spectral and Temperature Dependent Magneto Structural Correlation. *Inorg. Chem. Commun.* **2012**, 24, 216–220; DOI:10.1016/J.INOCHE.2012.07.017.
  19. Biswas, D.; Chakrabarty, P. P.; Saha, S.; Jana, A. D.; Schollmeyer, D.; García-Granda, S. Ligand Mediated Structural Diversity and Role of Different Weak Interactions in Molecular Self-Assembly of a Series of copper(II)–sodium(I) Schiff-Base Heterometallic Complexes. *Inorganica Chim. Acta* **2013**, 408, 172–180; DOI:10.1016/J.ICA.2013.09.011.

**Table S2.** Crystallographic data for complexes **1-5**.

| Identification code                                          | 1                                                                                                 | 2                                                                                                       | 3                                                                                                       | 4                                                                                                       | 5                                                                                                       |
|--------------------------------------------------------------|---------------------------------------------------------------------------------------------------|---------------------------------------------------------------------------------------------------------|---------------------------------------------------------------------------------------------------------|---------------------------------------------------------------------------------------------------------|---------------------------------------------------------------------------------------------------------|
| Empirical formula                                            | C <sub>42</sub> H <sub>48</sub> N <sub>5</sub> O <sub>20</sub> Br <sub>4</sub> Zn <sub>2</sub> Nd | C <sub>45</sub> H <sub>54.67</sub> N <sub>5</sub> O <sub>20.33</sub> Br <sub>4</sub> Zn <sub>2</sub> Sm | C <sub>42</sub> H <sub>52.67</sub> N <sub>5</sub> O <sub>22.33</sub> Br <sub>4</sub> Zn <sub>2</sub> Eu | C <sub>42</sub> H <sub>52.67</sub> N <sub>5</sub> O <sub>22.33</sub> Br <sub>4</sub> Zn <sub>2</sub> Tb | C <sub>42</sub> H <sub>52.67</sub> N <sub>5</sub> O <sub>22.33</sub> Br <sub>4</sub> Zn <sub>2</sub> Dy |
| Formula weight                                               | 1537.47                                                                                           | 1591.07                                                                                                 | 1587.23                                                                                                 | 1594.19                                                                                                 | 1597.77                                                                                                 |
| Temperature/K                                                | 293.0                                                                                             | 120(1)                                                                                                  | 120(1)                                                                                                  | 293.0                                                                                                   | 120(1)                                                                                                  |
| Crystal system                                               | monoclinic                                                                                        | monoclinic                                                                                              | trigonal                                                                                                | trigonal                                                                                                | trigonal                                                                                                |
| Space group                                                  | <i>P</i> 2 <sub>1</sub> / <i>n</i>                                                                | <i>P</i> 2 <sub>1</sub> / <i>n</i>                                                                      | <i>R</i> -3 <i>c</i>                                                                                    | <i>R</i> -3 <i>c</i>                                                                                    | <i>R</i> -3 <i>c</i>                                                                                    |
| <i>a</i> /Å                                                  | 9.9805(4)                                                                                         | 10.2675(2)                                                                                              | 19.8962(4)                                                                                              | 20.0572(5)                                                                                              | 19.8706(5)                                                                                              |
| <i>b</i> /Å                                                  | 24.132(1)                                                                                         | 23.8581(3)                                                                                              | 19.8962(4)                                                                                              | 20.0572(5)                                                                                              | 19.8706(5)                                                                                              |
| <i>c</i> /Å                                                  | 22.9091(7)                                                                                        | 22.5353(3)                                                                                              | 76.655(2)                                                                                               | 76.388(3)                                                                                               | 76.007(2)                                                                                               |
| $\alpha$ /°                                                  | 90                                                                                                | 90                                                                                                      | 90                                                                                                      | 90                                                                                                      | 90                                                                                                      |
| $\beta$ /°                                                   | 91.55(1)                                                                                          | 91.261(1)                                                                                               | 90                                                                                                      | 90                                                                                                      | 90                                                                                                      |
| $\gamma$ /°                                                  | 90                                                                                                | 90                                                                                                      | 120                                                                                                     | 120                                                                                                     | 120                                                                                                     |
| Volume/Å <sup>3</sup>                                        | 5515.4(4)                                                                                         | 5518.9(1)                                                                                               | 26279.2(9)                                                                                              | 26613(1)                                                                                                | 25990(1)                                                                                                |
| <i>Z</i>                                                     | 4                                                                                                 | 4                                                                                                       | 18                                                                                                      | 18                                                                                                      | 18                                                                                                      |
| $\rho_{\text{calc}}$ / g/cm <sup>3</sup>                     | 1.852                                                                                             | 1.915                                                                                                   | 1.7976                                                                                                  | 1.790                                                                                                   | 1.838                                                                                                   |
| $\mu$ /mm <sup>-1</sup>                                      | 4.763                                                                                             | 12.967                                                                                                  | 12.414                                                                                                  | 4.765                                                                                                   | 11.701                                                                                                  |
| <i>F</i> (000)                                               | 3020                                                                                              | 3136.0                                                                                                  | 13720.0                                                                                                 | 14100.0                                                                                                 | 14118.0                                                                                                 |
| Crystal size/mm <sup>3</sup>                                 | 0.25 × 0.12 × 0.02                                                                                | 0.4 × 0.35 × 0.02                                                                                       | 0.47 × 0.29 × 0.07                                                                                      | 0.30 × 0.30 × 0.20                                                                                      | 0.59 × 0.34 × 0.08                                                                                      |
| Radiation                                                    | Mo K $\alpha$ ( $\lambda$ = 0.71073)                                                              | Cu K $\alpha$ ( $\lambda$ = 1.54184)                                                                    | Cu K $\alpha$ ( $\lambda$ = 1.54184)                                                                    | Mo K $\alpha$ ( $\lambda$ = 0.71073)                                                                    | Cu K $\alpha$ ( $\lambda$ = 1.54184)                                                                    |
| 2 $\Theta$ range /°                                          | 5.3 to 50.48                                                                                      | 7.42 to 152.88                                                                                          | 8.88 to 135.34                                                                                          | 4.8 to 50.48                                                                                            | 8.9 to 135.36                                                                                           |
| Reflections collected                                        | 41616                                                                                             | 38779                                                                                                   | 58409                                                                                                   | 70659                                                                                                   | 35163                                                                                                   |
| Independent reflections                                      | 9953 [ <i>R</i> <sub>int</sub> = 0.0806, <i>R</i> <sub>sigma</sub> = 0.0852]                      | 11370 [ <i>R</i> <sub>int</sub> = 0.0548, <i>R</i> <sub>sigma</sub> = 0.0444]                           | 5291 [ <i>R</i> <sub>int</sub> = 0.1573, <i>R</i> <sub>sigma</sub> = 0.0539]                            | 5349 [ <i>R</i> <sub>int</sub> = 0.0860, <i>R</i> <sub>sigma</sub> = 0.0376]                            | 5229 [ <i>R</i> <sub>int</sub> = 0.0842, <i>R</i> <sub>sigma</sub> = 0.0405]                            |
| Data/restr./parameters                                       | 9953/0/659                                                                                        | 11370/0/699                                                                                             | 5291/6/350                                                                                              | 5349/6/352                                                                                              | 5229/6/350                                                                                              |
| Goodness-of-fit on <i>F</i> <sup>2</sup>                     | 1.042                                                                                             | 1.083                                                                                                   | 1.034                                                                                                   | 1.107                                                                                                   | 1.039                                                                                                   |
| Final <i>R</i> indexes [ <i>I</i> ≥ 2 $\sigma$ ( <i>I</i> )] | <i>R</i> <sub>1</sub> = 0.0593,<br><i>wR</i> <sub>2</sub> = 0.1250                                | <i>R</i> <sub>1</sub> = 0.0481,<br><i>wR</i> <sub>2</sub> = 0.1314                                      | <i>R</i> <sub>1</sub> = 0.0785,<br><i>wR</i> <sub>2</sub> = 0.2180                                      | <i>R</i> <sub>1</sub> = 0.0561,<br><i>wR</i> <sub>2</sub> = 0.1505                                      | <i>R</i> <sub>1</sub> = 0.0610,<br><i>wR</i> <sub>2</sub> = 0.1621                                      |
| Final <i>R</i> indexes [all data]                            | <i>R</i> <sub>1</sub> = 0.1121,<br><i>wR</i> <sub>2</sub> = 0.1544                                | <i>R</i> <sub>1</sub> = 0.0540,<br><i>wR</i> <sub>2</sub> = 0.1384                                      | <i>R</i> <sub>1</sub> = 0.0817,<br><i>wR</i> <sub>2</sub> = 0.2254                                      | <i>R</i> <sub>1</sub> = 0.0789,<br><i>wR</i> <sub>2</sub> = 0.1704                                      | <i>R</i> <sub>1</sub> = 0.0661,<br><i>wR</i> <sub>2</sub> = 0.1699                                      |
| Larg. diff. peak/hole / e Å <sup>-3</sup>                    | 2.21/-1.72                                                                                        | 2.29/-1.59                                                                                              | 2.76/-1.73                                                                                              | 2.08/-0.82                                                                                              | 2.07/-1.24                                                                                              |
| CCDC No.                                                     | 1849667                                                                                           | 1849666                                                                                                 | 1849668                                                                                                 | 1849669                                                                                                 | 1849665                                                                                                 |

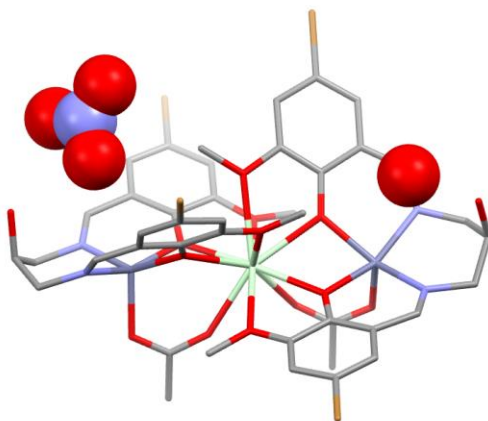

**Figure S1.** Location of hydrogen bonded NO<sub>3</sub><sup>-</sup> anion and water molecule in pockets formed by 2-hydroxypropyl groups in complex Zn<sup>II</sup>–Nd<sup>III</sup>–Zn<sup>II</sup> (1).

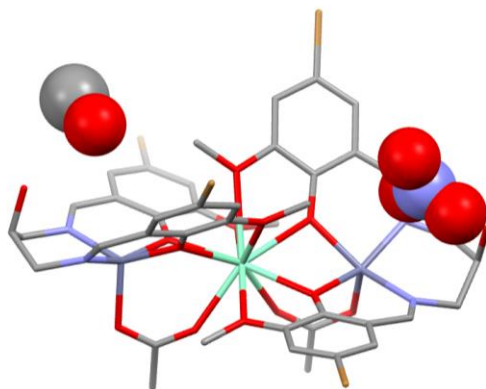

**Figure S2.** Location of hydrogen bonded NO<sub>3</sub><sup>-</sup> anion and methanol molecule in pockets formed by 2-hydroxypropyl groups in complex Zn<sup>II</sup>–Sm<sup>III</sup>–Zn<sup>II</sup> (2).

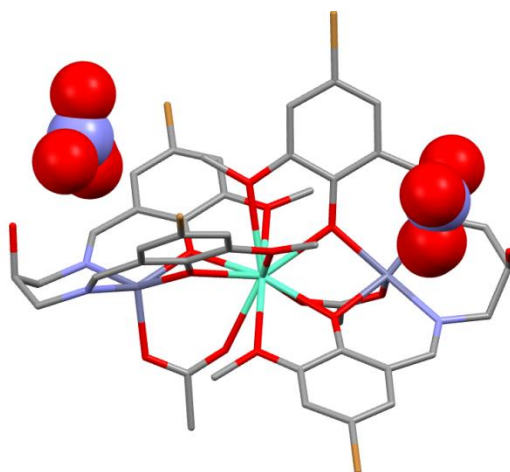

**Figure S3.** Location of disordered hydrogen bonded NO<sub>3</sub><sup>-</sup> anion and water molecule in pockets formed by 2-hydroxypropyl groups in complex Zn<sup>II</sup>–Eu<sup>III</sup>–Zn<sup>II</sup> (3).

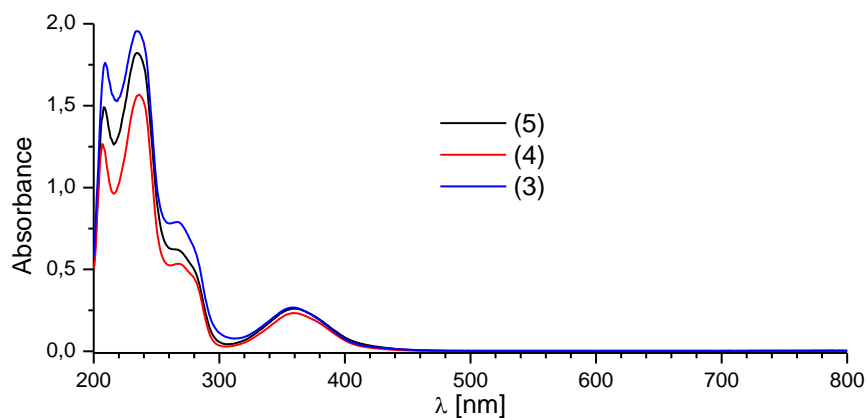

**Figure S4.** The absorbance spectra of compounds  $\text{Zn}^{\text{II}}\text{-Eu}^{\text{III}}\text{-Zn}^{\text{II}}$  (3),  $\text{Zn}^{\text{II}}\text{-Tb}^{\text{III}}\text{-Zn}^{\text{II}}$  (4) and  $\text{Zn}^{\text{II}}\text{-Dy}^{\text{III}}\text{-Zn}^{\text{II}}$  (5) in methanol solution ( $\sim 2 \cdot 10^{-5}$  M).

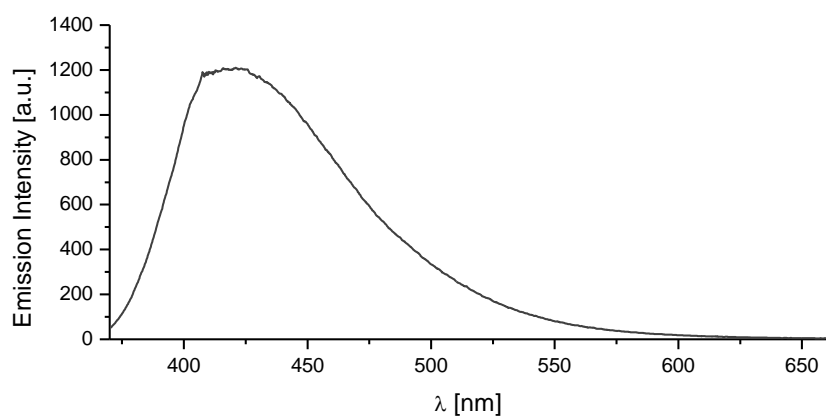

**Figure S5.** Luminescence spectrum of complex 1 ( $\text{Zn}^{\text{II}}\text{-Nd}^{\text{III}}\text{-Zn}^{\text{II}}$ ) in methanol solution ( $\sim 2 \cdot 10^{-5}$  M).

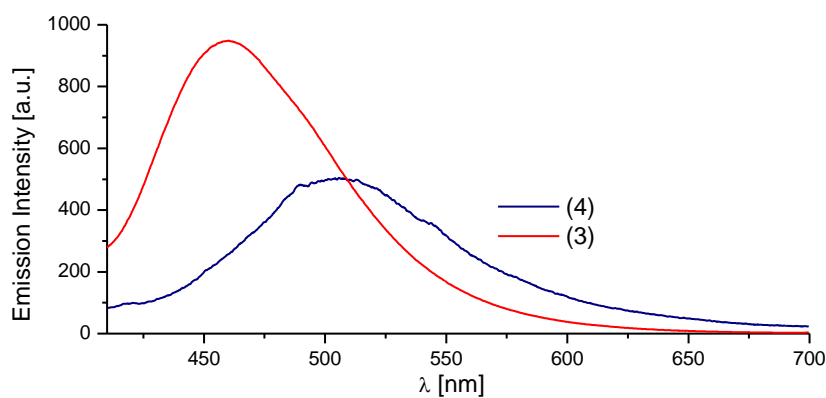

**Figure S6.** Solid state emission spectra of complexes 3 ( $\text{Zn}^{\text{II}}\text{-Eu}^{\text{III}}\text{-Zn}^{\text{II}}$ ) and 4 ( $\text{Zn}^{\text{II}}\text{-Tb}^{\text{III}}\text{-Zn}^{\text{II}}$ ).

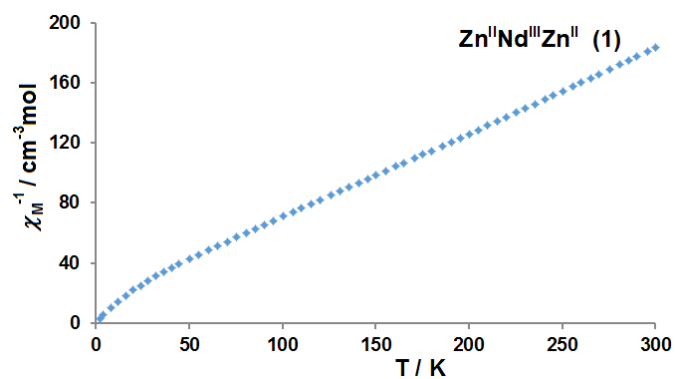

**Figure S7.** Temperature dependence of the experimental  $\chi_M^{-1}$  versus  $T$  for  $\text{Zn}^{\text{II}}\text{-Nd}^{\text{III}}\text{-Zn}^{\text{II}}$  (**1**).

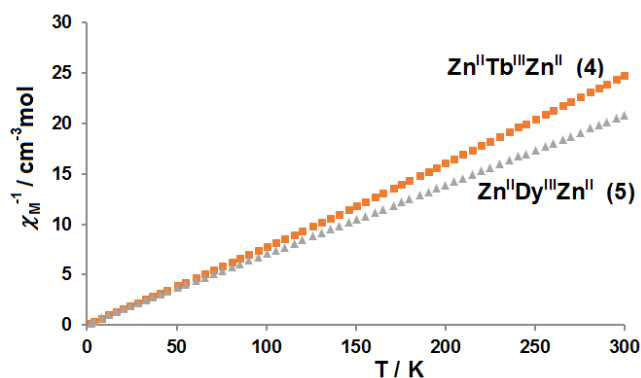

**Figure S8.** Temperature dependence of the experimental  $\chi_M^{-1}$  versus  $T$  for  $\text{Zn}^{\text{II}}\text{-Tb}^{\text{III}}\text{-Zn}^{\text{II}}$  (**4**) and  $\text{Zn}^{\text{II}}\text{-Dy}^{\text{III}}\text{-Zn}^{\text{II}}$  (**5**).

**Table S3.** Theoretical and experimental values of the  $\chi_M T$  product for compounds **1**, **4**, **5** at the room temperature.

| Complex                                                                           | No. of<br>$f$ electrons | Ground state<br>free ion symbol<br>( $2S+1L_J$ ) | $g_{L_n}$ | $\chi_M T_{\text{theor}} /$<br>$\text{cm}^3 \text{mol}^{-1} \text{K}$<br>( $\text{Ln}^{\text{III}}$ ) | $\chi_M T_{\text{exp}} /$<br>$\text{cm}^3 \text{mol}^{-1} \text{K}$<br>( $\text{Zn}^{\text{II}}_2 \text{Ln}^{\text{III}}$ ) |
|-----------------------------------------------------------------------------------|-------------------------|--------------------------------------------------|-----------|-------------------------------------------------------------------------------------------------------|-----------------------------------------------------------------------------------------------------------------------------|
| <b>1</b> ( $\text{Zn}^{\text{II}}\text{-Nd}^{\text{III}}\text{-Zn}^{\text{II}}$ ) | 3                       | $^4I_{9/2}$                                      | 8/11      | 1.64                                                                                                  | 1.62                                                                                                                        |
| <b>4</b> ( $\text{Zn}^{\text{II}}\text{-Tb}^{\text{III}}\text{-Zn}^{\text{II}}$ ) | 8                       | $^6F_6$                                          | 3/2       | 11.82                                                                                                 | 12.10                                                                                                                       |
| <b>5</b> ( $\text{Zn}^{\text{II}}\text{-Dy}^{\text{III}}\text{-Zn}^{\text{II}}$ ) | 9                       | $^4H_{15/2}$                                     | 4/3       | 14.17                                                                                                 | 14.39                                                                                                                       |

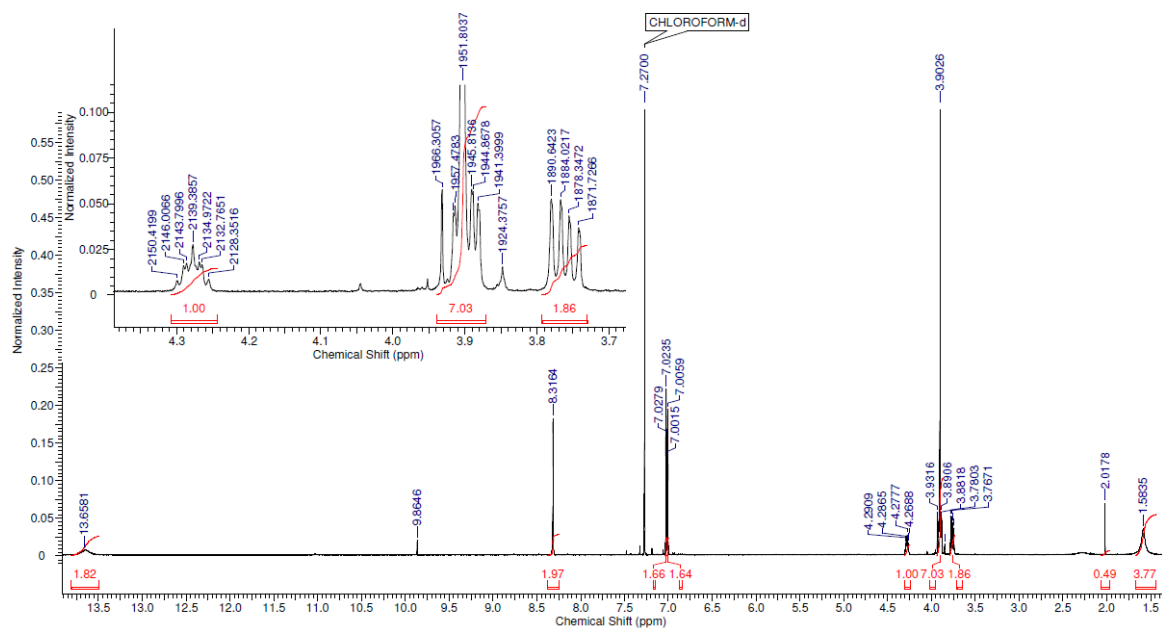

Figure S9. <sup>1</sup>H NMR spectrum of ligand H<sub>3</sub>L in CDCl<sub>3</sub> solution.

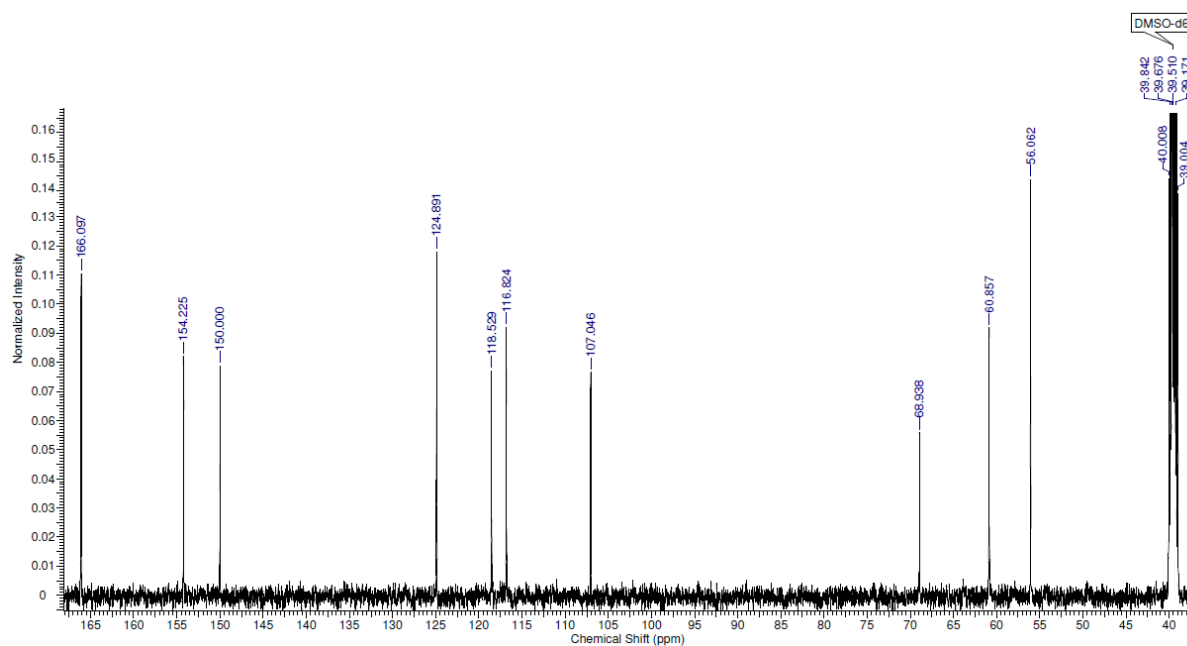

Figure S10. <sup>13</sup>C NMR spectrum of ligand H<sub>3</sub>L in DMSO-d<sub>6</sub> solution.
